# Supplementary material for: Risikofaktoren für postoperative Hypoxämie während des Transportes in den Aufwachraum und Einfluss von Transport-Monitoring
Source: Springer Nature journal article supplement (doi:10.1007/s00101-023-01296-y), 2023-06-09
Supplement: MOESM1 [file 25467566]

**Zusatzmaterial zum Beitrag „Risikofaktoren für postoperative Hypoxämie während des Transportes in den Aufwachraum und Einfluss von Transportmonitoring. Eine retrospektive propensity-score gematchte Datenbankanalyse“** von Haller K, Trauzeddel RF, Treskatsch S et al. (2023) in *Die Anaesthesiologie*.

Beitrag und Zusatzmaterial stehen Ihnen auf [www.springermedizin.de](http://www.springermedizin.de) zur Verfügung. Bitte geben Sie dort den Beitragstitel in die Suche ein.

**Anhang Tabelle 1:** Binäre logistische Regressionsanalyse für initiale Hypoxämie ( $SpO_2 \leq 90\%$ ) im Aufwachraum an 22.638 Patienten.

|                                                | Regressionskoeffizient | Standardfehler | p-Wert  | Odds Ratio | 95 % Konfidenzintervall |              |
|------------------------------------------------|------------------------|----------------|---------|------------|-------------------------|--------------|
|                                                |                        |                |         |            | oberer Wert             | unterer Wert |
| (Intercept)                                    | -3.943                 | 0.134          | < 0,001 |            |                         |              |
| Alter > 65                                     | 0.339                  | 0.069          | < 0,001 | 1,32       | 1,15                    | 1,52         |
| Männliches Geschlecht                          | -0.232                 | 0.067          | < 0,001 | 0,80       | 0,70                    | 0,91         |
| BMI > 30 kg/m <sup>2</sup>                     | 0.476                  | 0.076          | < 0,001 | 1,57       | 1,35                    | 1,83         |
| ASA > 2                                        | -0.021                 | 0.071          | 0.766   | 0,98       | 0,85                    | 1,13         |
| COPD                                           | 0.378                  | 0.142          | 0.008   | 1,43       | 1,08                    | 1,87         |
| OSAS                                           | 0.131                  | 0.227          | 0.566   | 1,12       | 0,70                    | 1,71         |
| NYHA I und II                                  | 0.343                  | 0.176          | 0.050   | 0,98       | 1,40                    | 1,95         |
| < 4 MET                                        | 0.070                  | 0.153          | 0.648   | 1,06       | 0,78                    | 1,42         |
| Notfalleingriff                                | 0.163                  | 0.105          | 0.121   | 1,17       | 0,95                    | 1,43         |
| OP-Risiko hoch, mittel                         | 0.137                  | 0.074          | 0.065   | 1,13       | 0,98                    | 1,31         |
| OP-Dauer > 2 Stunden                           | 0.137                  | 0.082          | 0.096   | 1,14       | 0,97                    | 1,34         |
| intraabdomineller Eingriff                     | -0.166                 | 0.093          | 0.075   | 0,84       | 0,70                    | 1,00         |
| erste $SpO_2 < 97\%$                           | 0.413                  | 0.080          | < 0,001 | 1,49       | 1,28                    | 1,75         |
| letzte $SpO_2 < 97\%$                          | 0.296                  | 0.079          | < 0,001 | 1,34       | 1,15                    | 1,82         |
| $P_{PEAK} > 30$ mbar                           | 0.536                  | 0.260          | 0.039   | 1,71       | 1,00                    | 2,79         |
| $FiO_2 > 50\%$                                 | -0.021                 | 0.074          | 0.776   | 0,98       | 0,84                    | 1,13         |
| Driving Pressure > 15 mbar                     | 0.385                  | 0.087          | < 0,001 | 1,46       | 1,23                    | 1,73         |
| PEEP > 5 mbar                                  | 0.166                  | 0.078          | 0.033   | 1,18       | 1,01                    | 1,37         |
| Relaxanz                                       | 0.150                  | 0.076          | 0.049   | 1,16       | 1,00                    | 1,35         |
| langwirksames Opioid                           | 0.382                  | 0.079          | < 0,001 | 1,47       | 1,26                    | 1,72         |
| TIVA                                           | -0.094                 | 0.101          | 0.355   | 0,91       | 0,75                    | 1,11         |
| Hosmer-Lemeshow-Test: $\chi^2(4) = 8, p = 0,8$ |                        |                |         |            |                         |              |
